# Supplementary material for: Effects of prophylactic swallowing exercises on dysphagia and quality of life in patients with head and neck cancer receiving (chemo) radiotherapy: the Redyor study, a protocol for a randomized clinical trial
Source: PubMed Central journal article supplement (PMC6694466; doi:10.1186/s13063-019-3587-x), 2019-08-14
Supplement: 13063_2019_3587_MOESM2_ESM.pdf [file 13063_2019_3587_MOESM2_ESM.pdf]

Additional file 2: Redyor study protocol approved by Clinical Ethics Committee of the Institut Hospital del Mar d'Investigacions Mèdiques

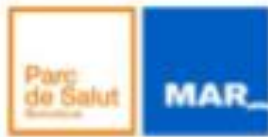

## CONFIRMATION

I confirm that the "Parc de Salut MAR - Ethics Committee" has reviewed and approved

- ✓ The clinical study entitled: *"Valoración de los beneficios de la rehabilitación profiláctica de la musculatura deglutoria sobre la calidad de vida y deglución, a corto y medio plazo, de los pacientes sometidos a radioterapia por cáncer de cabeza y cuello: Ensayo Clínico Aleatorizado"*.

In which Dr. Palmira Foro Amalot is the principal investigator.

- ✓ and accompanied patient information sheet and informed consent form

under the reference number: 2014/5707/I

at the meeting of: December 22<sup>nd</sup>, 2014

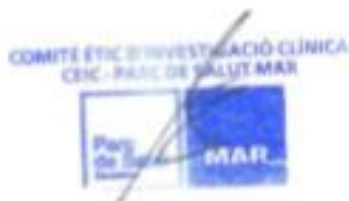

María Teresa Navarra Alcrudo  
Secretary  
Ethics Committee – Parc de Salut MAR

Barcelona, January 22<sup>nd</sup>, 2015
